# Supplementary material for: Direct determination of boscalid in grape samples by differential pulse voltammetry using a carbon paste electrode
Source: Royal Society of Chemistry journal article supplement (doi:10.1039/d1ay01134k), 2021-01-01
Supplement: d1ay01134k1.pdf [file d1ay01134k1.pdf]

### Supplementary material

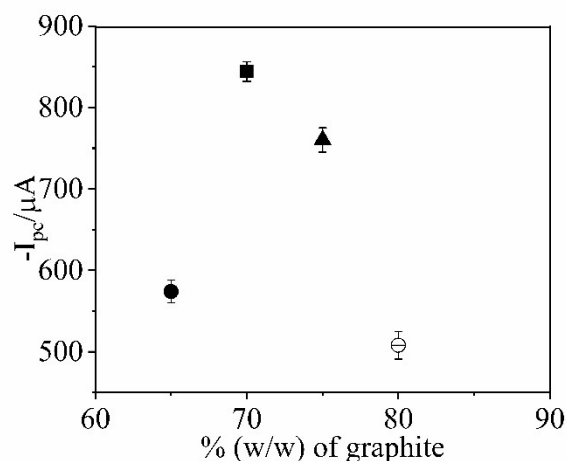

**Figure 1S.** Averages values with standard deviations of  $I_{pc}$  in  $1.00 \text{ mmol L}^{-1}$  of BSC using CPE in the following proportions of graphite/binder: (●) 65:35 (w/w); (■) 70:30; (w/w); (▲) 75:25 (w/w) and (⊖) 80:20 (w/w) in  $0.100 \text{ mol L}^{-1}$  of HCl/acetone 70:30 (v/v).

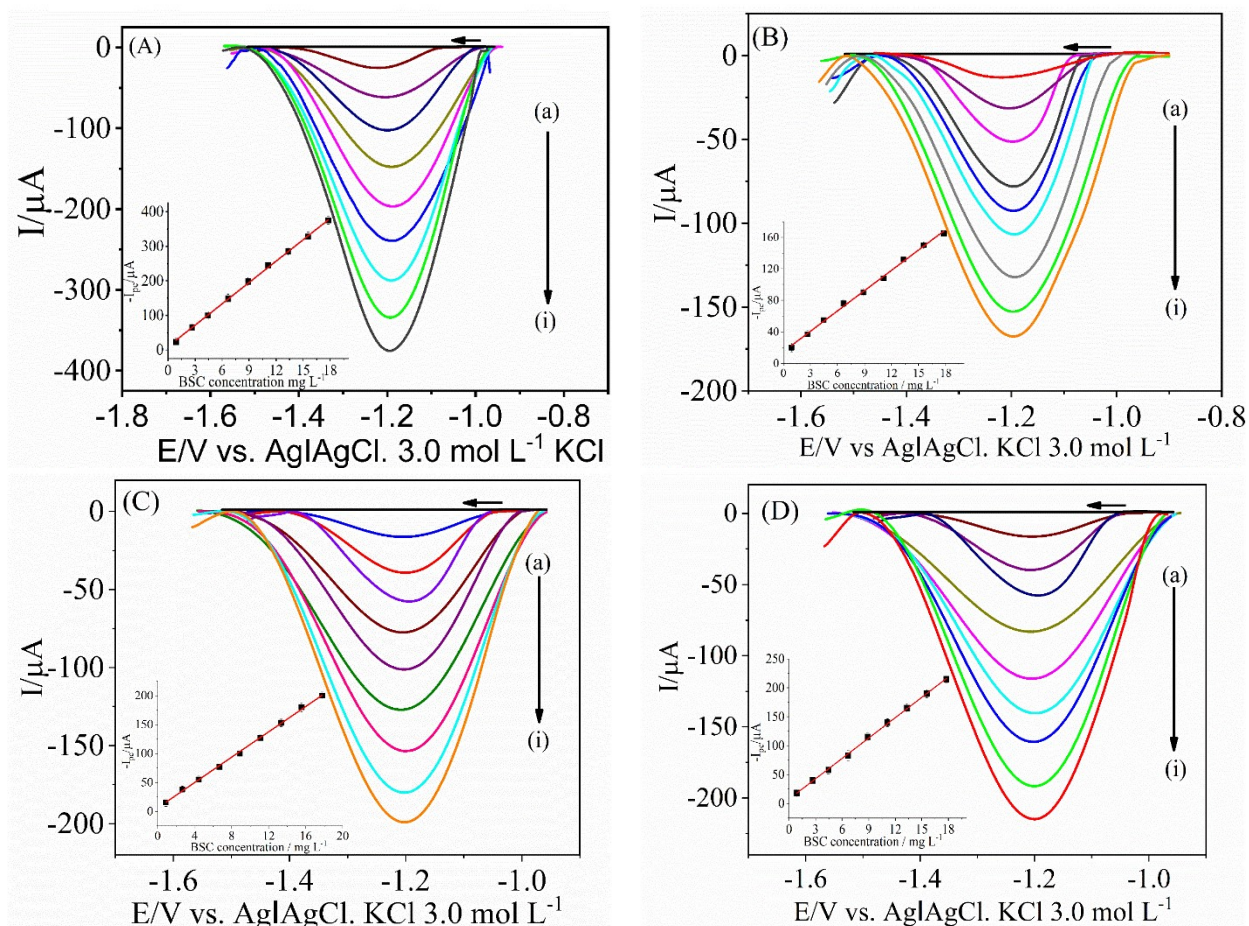

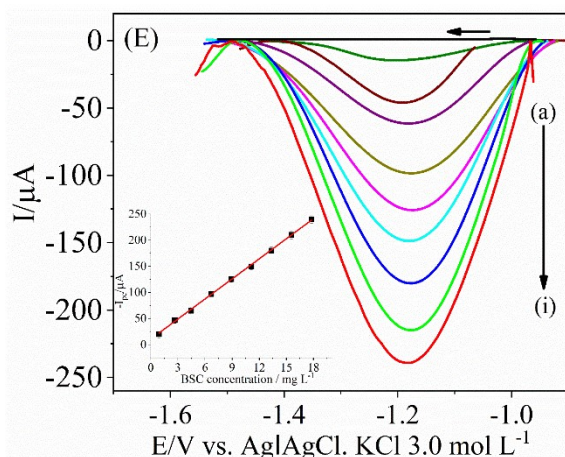

**Figure 2S.** DPV voltammograms for different concentrations of BSC in: (A) deionized water; (B) red grape 100% juice; (C) peel extracts; (D) pulp; (E) grape seed. Insert: variation of  $I_{pc}$  with concentration of BSC. The concentrations of BSC were (a) 0.900 mg L<sup>-1</sup>; (b) 2.67 mg L<sup>-1</sup>; (c) 4.44 mg L<sup>-1</sup>; (d) 6.67 mg L<sup>-1</sup>; (e) 8.89 mg L<sup>-1</sup>; (f) 11.12 mg L<sup>-1</sup>; (g) 13.32 mg L<sup>-1</sup>; (h) 15.60 mg L<sup>-1</sup> and (i) 18.00 mg L<sup>-1</sup>.

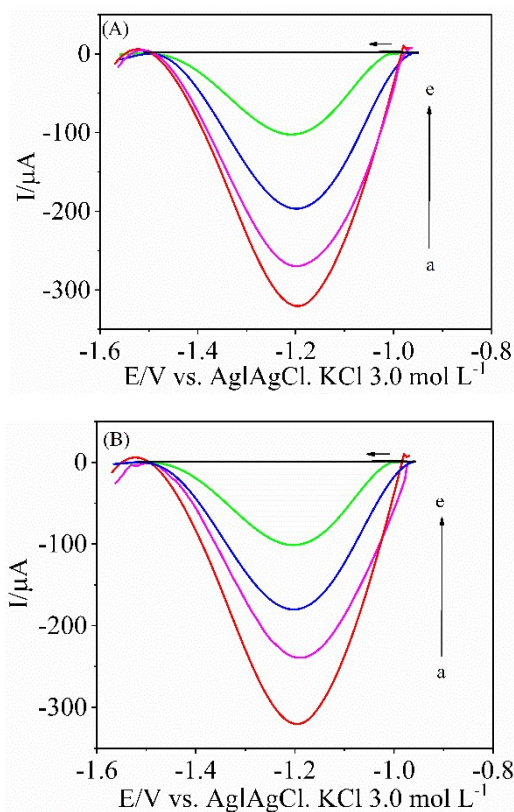

**Figure 3S.** Effect on the voltammetric response of 12.00 mg L<sup>-1</sup> of BSC using CPE in the presence of the interferents (A) citric acid and (B) tartaric acid at concentrations of: (a) 0; (b) 120.0 mg L<sup>-1</sup>; (c) 600.0 mg L<sup>-1</sup>; (d) 1,200 mg L<sup>-1</sup> and (e) absence of BSC and interferents.
